# Supplementary material for: Oil-In-Water Microemulsions as Hosts for Benzothiophene-Based Cytotoxic Compounds: An Effective Combination
Source: MDPI journal article supplement (doi:10.3390/biomimetics3020013), 2018-06-16
Supplement: s1 [file s1]

# Supplementary Materials: Oil-In-Water Microemulsions as Hosts for Benzothiophene-Based Cytotoxic Compounds: An Effective Combination

Ioanna Theochari <sup>1</sup>, Vassiliki Papadimitriou <sup>1</sup>, Demetris Papahatjis <sup>1</sup>, Nikos Assimomytis <sup>1</sup>, Efthimia Pappou <sup>1</sup>, Harris Pratsinis <sup>2</sup>, Aristotelis Xenakis <sup>1</sup> and Vasiliki Pletsa <sup>1,\*</sup>

<sup>1</sup> Institute of Biology, Medicinal Chemistry & Biotechnology, National Hellenic Research Foundation, 48 Vassileos Constantinou Avenue, 11635 Athens, Greece; jtheohari@eie.gr (I.T.); vpapa@eie.gr (V.Pa.); dpapah@eie.gr (D.P.); nassim@eie.gr (N.A.); epappou@eie.gr (E.P.); arisx@eie.gr (A.X.)

<sup>2</sup> Laboratory of Cell Proliferation and Ageing, Institute of Biosciences and Applications, National Centre of Scientific Research “Demokritos”, 11635 Athens, Greece; hprats@bio.demokritos.gr

\* Correspondence: vpletsa@eie.gr; Tel.: +302-107-273-7541

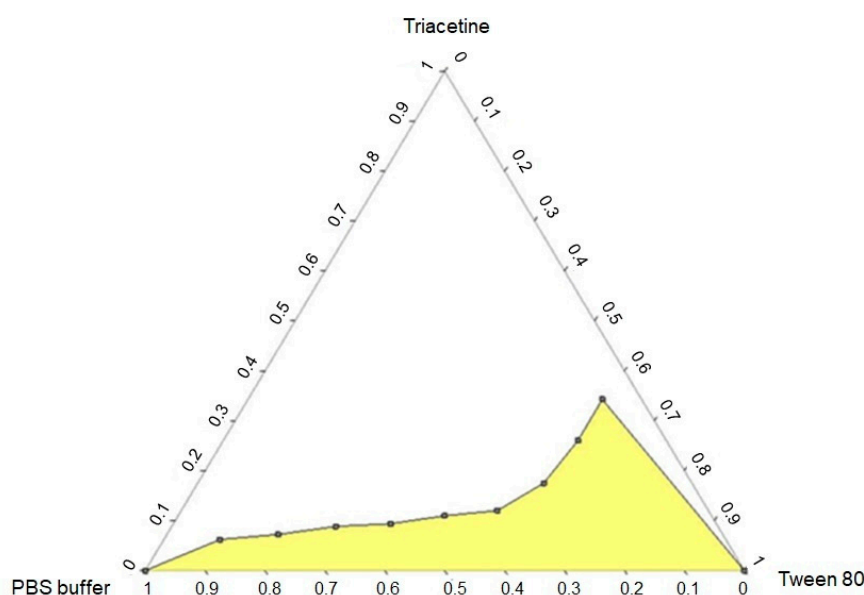

**Figure S1.** The ternary phase diagram of O/W microemulsion consists of PBS buffer as continuous aqueous phase, triacetin as oil phase and Tween 80 as surfactant.

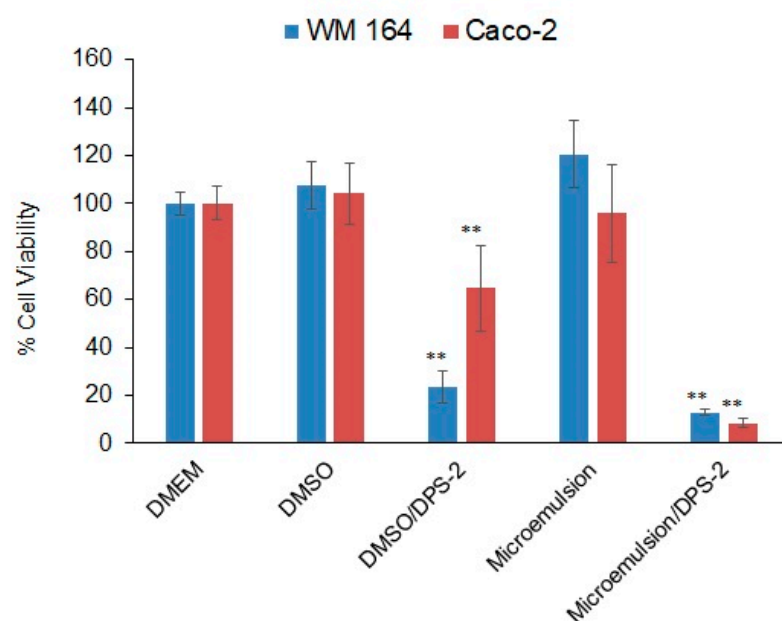

**Figure S2.** MTT cell proliferation assay in WM 164 and Caco-2 cell lines after 96 h of treatment: DMEM; DMSO 0.1% v/v; DPS-2 solubilized in DMSO at 5.6  $\mu$ M, as positive control samples; O/W microemulsion empty 0.2% v/v; O/W microemulsion loaded with DPS-2 at 5.6  $\mu$ M. The mean ( $\pm$ SD) of three independent experiments, each performed in five replicates, is presented. Statistically significant results are indicated by asterisks (\*) when  $p < 0.05$  and (\*\*) when  $p < 0.01$  (Student's *t*-test).

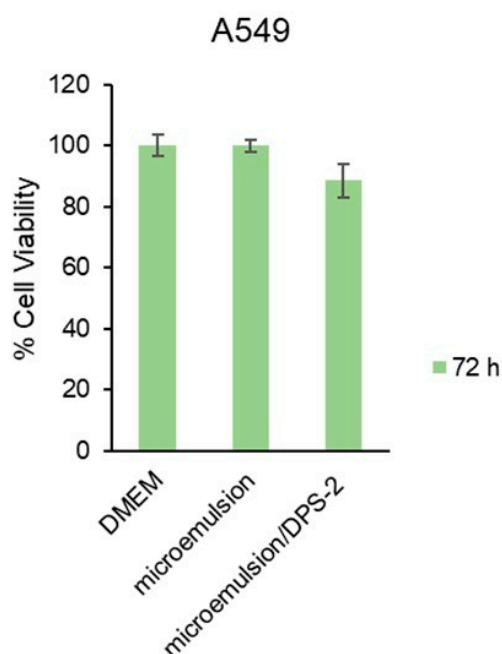

**Figure S3.** MTT cell proliferation assay A549 cell line after 72 h of treatment: DMEM as positive control sample; O/W microemulsion empty 0.2% v/v; O/W microemulsion loaded with DPS-2 at 5.6  $\mu$ M. The mean ( $\pm$ SD) of three independent experiments, each performed in five replicates, is presented. The results were not statistically significant (Student's *t*-test).

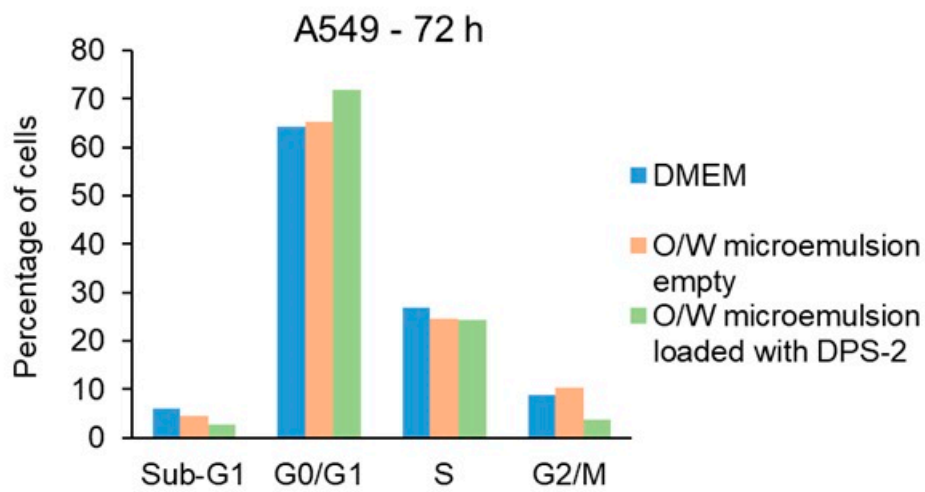

**Figure S4.** Cell cycle analysis. Nontreated (DMEM) and treated (O/W microemulsion empty 0.2% v/v; O/W microemulsion loaded with DPS-2 at 5.6 $\mu$ M) A549 cells harvested at 72 h were stained with propidium iodide and subjected to cytofluorometric analysis of DNA content. A representative experiment out of two similar ones is depicted.
